# Supplementary material for: Clinical Pharmacokinetics of the Novel HIV-1 Non-Nucleoside Reverse Transcriptase Inhibitor Doravirine: An Assessment of the Effect of Patient Characteristics and Drug–Drug Interactions
Source: PubMed Central journal article supplement — Clin Drug Investig. 2020 Aug 20;40(10):927–46. doi: 10.1007/s40261-020-00934-2 (PMC7511279; doi:10.1007/s40261-020-00934-2), 2020-08-20
Supplement: 40261_2020_934_MOESM1_ESM.pdf [file 40261_2020_934_MOESM1_ESM.pdf]

**SUPPLEMENTARY INFORMATION**

**Clinical Pharmacokinetics of the Novel HIV-1 Non-Nucleoside Reverse Transcriptase Inhibitor Doravirine: An Assessment of the Effect of Patient Characteristics and Drug–Drug Interactions**

Sauzanne Khalilieh<sup>1\*</sup>, Ka Lai Yee<sup>1\*</sup>, Rosa Sanchez<sup>1</sup>, S. Aubrey Stoch<sup>1</sup>, Larissa Wenning<sup>1</sup>, and Marian Iwamoto<sup>1</sup>

*\*These authors contributed equally*

<sup>1</sup>*Merck & Co., Inc., Kenilworth, New Jersey, USA*

**Corresponding author:** Sauzanne Khalilieh; Merck & Co., Inc., 2000 Galloping Hill Road,

Kenilworth, New Jersey 07033, USA; tel: +1 908 740 7461; email: [sauzanne.khalilieh@merck.com](mailto:sauzanne.khalilieh@merck.com)

**Table S1.** Summary of trials included in this review

| Factor/concomitant medication under investigation | Trial number [reference] | Trial design and description                                                                                                                                                                                                                      | Treatment                                                                                                                                                                              | Enrolled/completed (male/female)                                                                            |
|---------------------------------------------------|--------------------------|---------------------------------------------------------------------------------------------------------------------------------------------------------------------------------------------------------------------------------------------------|----------------------------------------------------------------------------------------------------------------------------------------------------------------------------------------|-------------------------------------------------------------------------------------------------------------|
| <b>Phase I trials in healthy participants</b>     |                          |                                                                                                                                                                                                                                                   |                                                                                                                                                                                        |                                                                                                             |
| Age/gender                                        | MK-1439-009 [22]         | <ul style="list-style-type: none"> <li>Relative bioavailability study to compare the pharmacokinetics of doravirine in male and female subjects and healthy elderly and young subjects</li> <li>Open-label, one-period, parallel-group</li> </ul> | <ul style="list-style-type: none"> <li>100 mg doravirine SD</li> </ul>                                                                                                                 | 36/36<br>(12/24)<br><br>(elderly male, $n = 12$ ;<br>elderly female, $n = 12$ ;<br>young female, $n = 12$ ) |
| Hepatic impairment                                | MK-1439-019 [25]         | <ul style="list-style-type: none"> <li>Influence of hepatic insufficiency on the pharmacokinetics of doravirine</li> <li>Two-part, open-label</li> </ul>                                                                                          | <ul style="list-style-type: none"> <li>Part 1: 100 mg doravirine SD</li> <li>Part 2: Not conducted</li> </ul>                                                                          | 16/16<br>(12/4)<br><br>(moderate hepatic<br>insufficient, $n = 8$ ;<br>healthy control, $n = 8$ )           |
| Renal impairment                                  | MK-1439-051 [24]         | <ul style="list-style-type: none"> <li>Evaluation of the pharmacokinetics of doravirine in subjects with severe renal impairment</li> <li>Open label, parallel assignment</li> </ul>                                                              | <ul style="list-style-type: none"> <li>100 mg doravirine SD</li> </ul>                                                                                                                 | 16/16<br>(11/5)<br><br>(severe renal<br>impairment, $n = 8$ ;<br>healthy control, $n = 8$ )                 |
| Food                                              | MK-1439-037 [23]         | <ul style="list-style-type: none"> <li>Comparative fed and fasted bioavailability of doravirine</li> <li>Open-label, randomized, two-period, crossover</li> </ul>                                                                                 | <ul style="list-style-type: none"> <li>100 mg doravirine SD fed and fasted</li> </ul>                                                                                                  | 14/14<br>(7/7)                                                                                              |
|                                                   | MK-1439A-029 [23]        | <ul style="list-style-type: none"> <li>Comparative fed and fasted bioavailability of DOR/TDF/3TC</li> <li>Open-label, randomized, two-period, crossover</li> </ul>                                                                                | <ul style="list-style-type: none"> <li>DOR/TDF/3TC (100 mg doravirine/300 mg TDF/300 mg lamivudine) SD fed and fasted</li> </ul>                                                       | 14/13<br>(9/5)                                                                                              |
| TDF                                               | MK-1439-003 [31]         | <ul style="list-style-type: none"> <li>Evaluation of the effect of multiple doses of tenofovir on the single dose pharmacokinetics of doravirine</li> <li>Open label, two period, fixed sequence</li> </ul>                                       | <ul style="list-style-type: none"> <li>Period 1: 100 mg doravirine SD alone</li> <li>Period 2: 300 mg TDF QD <math>\times</math> 18 Days and 100 mg doravirine SD on Day 14</li> </ul> | 8/7<br>(8/0)                                                                                                |

| <b>Factor/concomitant medication under investigation</b> | <b>Trial number [reference]</b> | <b>Trial design and description</b>                                                                                                                                                                                                                           | <b>Treatment</b>                                                                                                                                                                                                                                                | <b>Enrolled/completed (male/female)</b> |
|----------------------------------------------------------|---------------------------------|---------------------------------------------------------------------------------------------------------------------------------------------------------------------------------------------------------------------------------------------------------------|-----------------------------------------------------------------------------------------------------------------------------------------------------------------------------------------------------------------------------------------------------------------|-----------------------------------------|
|                                                          | MK-1439-038 [31]                | <ul style="list-style-type: none"> <li>• A component interaction study of DOR/3TC/TDF (doravirine, lamivudine, tenofovir disoproxil fumarate)</li> <li>• Open-label, randomized, three-period, crossover</li> </ul>                                           | <ul style="list-style-type: none"> <li>• Treatment A: doravirine 100 mg SD</li> <li>• Treatment B: lamivudine 300 mg + TDF 300 mg SD</li> <li>• Treatment C: doravirine 100 mg + lamivudine 300 mg + TDF 300 mg SD</li> </ul>                                   | 15/15<br>(7/8)                          |
| Efavirenz                                                | MK-1439-020 [15]                | <ul style="list-style-type: none"> <li>• Effect of switching from efavirenz therapy to doravirine on the pharmacokinetics of doravirine</li> <li>• Open-label, three-period, fixed-sequence, multiple-dose</li> </ul>                                         | <ul style="list-style-type: none"> <li>• Period 1: 100 mg doravirine QD Days 1–5</li> <li>• Period 2: 600 mg efavirenz QD Days 1–14</li> <li>• Period 3: 100 mg doravirine QD Days 1–14</li> </ul>                                                              | 20/17<br>(17/3)                         |
| Midazolam                                                | MK-1439-001 [11]                | <ul style="list-style-type: none"> <li>• Safety and pharmacokinetics of doravirine and the effect of multiple doses of doravirine on midazolam</li> <li>• Part 2: Double blind, randomized, placebo controlled, serial panel, rising multiple dose</li> </ul> | <ul style="list-style-type: none"> <li>• Part 2 Panel E: midazolam 2 mg SD alone; 120 mg doravirine QD × 14 days + 2 mg midazolam on Day 13 and placebo matched to doravirine</li> </ul>                                                                        | 10/9<br>(10/0)                          |
| Ritonavir                                                | MK-1439-002 [26]                | <ul style="list-style-type: none"> <li>• DDI study of the effect of multiple doses of ritonavir on the single dose pharmacokinetics of doravirine</li> <li>• Open-label, fixed-sequence, two-period</li> </ul>                                                | <ul style="list-style-type: none"> <li>• Period 1: 50 mg doravirine SD alone</li> <li>• Period 2: 100 mg BID ritonavir on Days 1–20 and 50 mg doravirine SD on Day 14</li> </ul>                                                                                | 8/8<br>(8/-)                            |
| Dolutegravir                                             | MK-1439-016 [20]                | <ul style="list-style-type: none"> <li>• Two-way steady-state DDI study of doravirine and dolutegravir</li> <li>• Open-label, three-period, fixed-sequence</li> </ul>                                                                                         | <ul style="list-style-type: none"> <li>• Period 1: 50 mg dolutegravir QD Days 1–7</li> <li>• Period 2: 200 mg doravirine QD Days 1–7</li> <li>• Period 3: 200 mg doravirine QD + 50 mg dolutegravir QD Days 1–7</li> </ul>                                      | 12/11<br>(6/6)                          |
| Elbasvir/grazoprevir                                     | MK-1439-050 [27]                | <ul style="list-style-type: none"> <li>• DDI study of doravirine with elbasvir + grazoprevir</li> <li>• Open-label, three-period, fixed-sequence</li> </ul>                                                                                                   | <ul style="list-style-type: none"> <li>• Period 1: 100 mg doravirine QD Days 1–5</li> <li>• Period 2: 50 mg elbasvir + 200 mg grazoprevir QD Days 1–10</li> <li>• Period 3: 100 mg doravirine QD and 50 mg elbasvir + 200 mg grazoprevir QD Days 1–5</li> </ul> | 12/12<br>(5/7)                          |

| <b>Factor/concomitant medication under investigation</b> | <b>Trial number [reference]</b> | <b>Trial design and description</b>                                                                                                                                                                                                                                    | <b>Treatment</b>                                                                                                                                                                                                                              | <b>Enrolled/completed (male/female)</b> |
|----------------------------------------------------------|---------------------------------|------------------------------------------------------------------------------------------------------------------------------------------------------------------------------------------------------------------------------------------------------------------------|-----------------------------------------------------------------------------------------------------------------------------------------------------------------------------------------------------------------------------------------------|-----------------------------------------|
| Ledipasvir/sofosbuvir                                    | MK-1439-053 [27]                | <ul style="list-style-type: none"> <li>• DDI study of doravirine with ledipasvir/sofosbuvir</li> <li>• Open-label, randomized, three-period, crossover</li> </ul>                                                                                                      | <ul style="list-style-type: none"> <li>• Treatment A: 100 mg doravirine SD;</li> <li>• Treatment B: 90 mg ledipasvir + 400 mg sofosbuvir SD;</li> <li>• Treatment C: 100 mg doravirine + 90 mg ledipasvir + 400 mg sofosbuvir SD</li> </ul>   | 14/14<br>(12/2)                         |
| Ketoconazole                                             | MK-1439-010 [26]                | <ul style="list-style-type: none"> <li>• DDI study of the effect of multiple oral doses of ketoconazole on the single dose pharmacokinetics of doravirine</li> <li>• Open-label, two-period, fixed-sequence</li> </ul>                                                 | <ul style="list-style-type: none"> <li>• Period 1: 100 mg doravirine SD alone</li> <li>• Period 2: 400 mg ketoconazole QD Days 1–10 and 100 mg doravirine SD on Day 2</li> </ul>                                                              | 10/10<br>(8/2)                          |
| Rifampin                                                 | MK-1439-011 [74]                | <ul style="list-style-type: none"> <li>• DDI study of the effect of single and multiple doses of rifampin on the single dose pharmacokinetics of doravirine</li> <li>• Open-label, two-period, fixed-sequence</li> </ul>                                               | <ul style="list-style-type: none"> <li>• Period 1: 100 mg doravirine SD alone</li> <li>• Period 2: 600 mg rifampin and 100 mg doravirine SD on Day 1; 600 mg rifampin QD Days 4–18 and 100 mg doravirine SD on Day 17.</li> </ul>             | 11/10<br>(11/0)                         |
| Rifabutin                                                | MK-1439-035 [75]                | <ul style="list-style-type: none"> <li>• DDI study of the effect of multiple doses of rifabutin on the single-dose pharmacokinetics of doravirine</li> <li>• Open-label, two-period, fixed-sequence</li> </ul>                                                         | <ul style="list-style-type: none"> <li>• Period 1: 100 mg doravirine SD alone</li> <li>• Period 2: 300 mg Rifabutin QD Days 1–16 and 100 mg doravirine SD on Day 14</li> </ul>                                                                | 18/12<br>(15/3)                         |
| Metformin                                                | MK-1439-048 [29]                | <ul style="list-style-type: none"> <li>• DDI study of the effect of multiple doses of doravirine on metformin pharmacokinetics</li> <li>• Open-label, two-period, fixed-sequence</li> </ul>                                                                            | <ul style="list-style-type: none"> <li>• Period 1: 1000 mg metformin SD fed alone</li> <li>• Period 2: 100 mg doravirine QD Days 1–7 fed and 1000 mg metformin SD on Day 5 fed</li> </ul>                                                     | 14/14<br>(9/5)                          |
| Atorvastatin                                             | MK-1439-036 [21]                | <ul style="list-style-type: none"> <li>• DDI study of the effect of doravirine at steady state on the pharmacokinetics of atorvastatin</li> <li>• Open-label, two-period, fixed-sequence</li> </ul>                                                                    | <ul style="list-style-type: none"> <li>• Period 1: 20 mg atorvastatin SD alone</li> <li>• Period 2: 100 mg doravirine QD Days 1–8 and 20 mg atorvastatin SD on Day 5</li> </ul>                                                               | 16/14<br>(8/8)                          |
| Methadone                                                | MK-1439-045 [30]                | <ul style="list-style-type: none"> <li>• DDI study of the effect of doravirine on methadone pharmacokinetics</li> <li>• Open-label, fixed-sequence, multiple-dose</li> </ul>                                                                                           | <ul style="list-style-type: none"> <li>• 20–200 mg methadone QD Days 1–7 and 100 mg doravirine QD Days 2–6</li> </ul>                                                                                                                         | 14/14<br>(7/7)                          |
| Oral contraceptives                                      | MK-1439-012 [26]                | <ul style="list-style-type: none"> <li>• DDI study of the effect of multiple oral doses of doravirine on the single dose pharmacokinetics of an oral contraceptive (ethinyl estradiol and levonorgestrel)</li> <li>• Open-label, two-period, fixed-sequence</li> </ul> | <ul style="list-style-type: none"> <li>• Period 1: 0.15 mg/0.03 mg levonorgestrel/ethinyl estradiol SD alone</li> <li>• Period 2: 100 mg doravirine QD Days 1–17 and 0.15 mg/0.03 mg levonorgestrel/ethinyl estradiol SD on Day 14</li> </ul> | 20/19<br>(0/20)                         |

| Factor/concomitant medication under investigation            | Trial number [reference]       | Trial design and description                                                                                                                                                                                                                                                                  | Treatment                                                                                                                                                                                                                                                                                                                                                                                              | Enrolled/completed (male/female)                                      |
|--------------------------------------------------------------|--------------------------------|-----------------------------------------------------------------------------------------------------------------------------------------------------------------------------------------------------------------------------------------------------------------------------------------------|--------------------------------------------------------------------------------------------------------------------------------------------------------------------------------------------------------------------------------------------------------------------------------------------------------------------------------------------------------------------------------------------------------|-----------------------------------------------------------------------|
| Antacids                                                     | MK-1439-042 [28]               | <ul style="list-style-type: none"> <li>• DDI study of the effect of an aluminum- and magnesium-containing antacid and a proton pump inhibitor on the single-dose pharmacokinetics of doravirine</li> <li>• Open-label, three-period, fixed-sequence</li> </ul>                                | <ul style="list-style-type: none"> <li>• Period 1: 100 mg doravirine SD alone</li> <li>• Period 2: 100 mg doravirine SD + 20 mL antacid oral suspension (400 mg/5 mL aluminium hydroxide, 400mg/5 mL magnesium hydroxide, and 40 mg/5 mL simethicone) SD</li> <li>• Period 3: 40 mg pantoprazole QD Days 1–5 and 100 mg doravirine SD on Day 5</li> </ul>                                              | 14/13<br>(8/6)                                                        |
| Drug cessation                                               | [12]                           | <ul style="list-style-type: none"> <li>• Pharmacokinetic forgiveness</li> <li>• Open-label</li> </ul>                                                                                                                                                                                         | <ul style="list-style-type: none"> <li>• 100 mg doravirine QD Days 1–5</li> </ul>                                                                                                                                                                                                                                                                                                                      | 14/14<br>(7/7)                                                        |
| <b>Phase I, II, and III trials in people living with HIV</b> |                                |                                                                                                                                                                                                                                                                                               |                                                                                                                                                                                                                                                                                                                                                                                                        |                                                                       |
| Phase I                                                      | MK-1439-005 [13]               | <ul style="list-style-type: none"> <li>• A multiple dose study to evaluate the safety, tolerability, pharmacokinetics and antiretroviral activity of doravirine</li> <li>• Randomized, double-blind, placebo-controlled, two-panel, parallel-group trial in people living with HIV</li> </ul> | <ul style="list-style-type: none"> <li>• Panel A: 25 mg doravirine QD Days 1–7 or placebo matched to doravirine</li> <li>• Panel B: 200 mg doravirine QD Days 1-7 or placebo matched to doravirine</li> </ul>                                                                                                                                                                                          | 18/18<br>(18/0)<br>Doravirine: <i>n</i> = 12<br>Placebo: <i>n</i> = 6 |
| Phase IIb                                                    | MK-1439-007 (NCT01632345) [17] | <ul style="list-style-type: none"> <li>• 96-week safety and efficacy of doravirine versus efavirenz</li> <li>• Randomized, double-blind trial in ART-naive adults</li> </ul>                                                                                                                  | <ul style="list-style-type: none"> <li>• Part 1: randomized 1:1:1:1 to receive 25, 50, 100, or 200 mg doravirine or 600 mg efavirenz (co-administered with 300 mg TDF/200 mg FTC) QD for up to 96 weeks</li> <li>• Part 2: new participants randomized 1:1 to 100 mg doravirine or 600 mg efavirenz QD, participants receiving doravirine in Part 1 received 100 mg doravirine QD in Part 2</li> </ul> | Doravirine: <i>n</i> = 232<br>Efavirenz: <i>n</i> = 108               |
| Phase III DRIVE-FORWARD                                      | MK-1439-018 (NCT02275780) [5]  | <ul style="list-style-type: none"> <li>• Comparison of doravirine with ritonavir-boosted darunavir, both given with two nucleoside reverse transcriptase inhibitors</li> <li>• Randomized, controlled, double-blind, multicenter, non-inferiority trial in ART-naive adults</li> </ul>        | <ul style="list-style-type: none"> <li>• Randomized 1:1 to receive either 100 mg doravirine or 800 mg darunavir/100 mg ritonavir, plus a fixed-dose combination of 300 mg tenofovir/200 mg emtricitabine, or 600 mg abacavir/300 mg lamivudine QD for up to 96 weeks</li> </ul>                                                                                                                        | Doravirine: <i>n</i> = 383<br>darunavir/ritonavir: <i>n</i> = 383     |

| <b>Factor/concomitant medication under investigation</b> | <b>Trial number [reference]</b> | <b>Trial design and description</b>                                                                                                                                                                            | <b>Treatment</b>                                                                                                                                             | <b>Enrolled/completed (male/female)</b>                   |
|----------------------------------------------------------|---------------------------------|----------------------------------------------------------------------------------------------------------------------------------------------------------------------------------------------------------------|--------------------------------------------------------------------------------------------------------------------------------------------------------------|-----------------------------------------------------------|
| Phase III DRIVE-AHEAD                                    | MK-1439A-021 (NCT02403674) [4]  | <ul style="list-style-type: none"> <li>• Comparison of the fixed-dose combination tablet, DOR/3TC/TDF to EFV/FTC/TDF</li> <li>• Randomized, double-blind, non-inferiority trial in ART-naive adults</li> </ul> | <ul style="list-style-type: none"> <li>• Randomized 1:1 to receive either 100 mg DOR/300 mg 3TC/300 mg TDF or 600 mg EFV/200 mg FTC/300 mg TDF QD</li> </ul> | DOR/3TC/TDF: <i>n</i> = 364<br>EFV/FTC/TDF <i>n</i> = 364 |

3TC, lamivudine; ART, antiretroviral therapy; BID, twice daily; DDI, drug–drug interaction; DOR, doravirine; EFV, efavirenz; FTC; emtricitabine, QD, once daily;

TDF, tenofovir disoproxil fumarate; SD, single dose
